# Supplementary material
Source: publisher site journal article supplement (https://www.dovepress.com/article/545159)
Supplement: Supplementary file 1 [file 545159%20Supplementary%20Material_1.docx]

**Supplementary material**

## Dihydromyricetin improves ulcerative colitis by suppressing NLRP3 Inflammasome activation caused by dysbiosis of gut microbiota

**Supplementary Methods**

1. Rules of disease activity index (DAI) score
2. 16S rRNA gene sequencing
3. DNA extraction of fecal bacteria and abundance quantitative by quantitative reverse transcription‑polymerase chain reaction (RT‑qPCR)

**Supplementary Figures**

Supplementary Fig. S1 Genotype identification of experimental mice

Supplementary Fig. S2 Abundance determination of gut microbiota in mice treated with antibiotic mixtures

**Supplementary Tables**

Supplementary Table 1. List of primer sequences for RT-qPCR analysis

Supplementary Table 2. Criteria of histological score

Supplementary Table 3. Statistics on raw/clean reads for 16S rRNA gene sequencing

Supplementary Table 4. List of primer sequences for RT-qPCR to determine gut microbiota abundances

**Supplementary Methods**

1. **Rules of disease activity index (DAI) score**

During the experiment, mice were checked daily for body weight, anal bleedings, and stool consistency. The DAI was determined by combining weight loss with the scores of anal bleeding and stool consistency. It was calculated as DAI = (weight loss score + anal bleeding score + stool consistency score) / 3. Specifically, each score was determined as follows: 1) no loss of body weight was scored as 0, 1 point for 1–5% weight loss, 2 points for 6–10%, 3 points for 11–15%, and 4 points for > 15%; 2) no blood was scored as 0, 2 points for positive occult blood, and 4 points for gross bleeding; 3) well-formed stool pellets were scored as 0, pasty stools but not adhering to the anus as 2 points, and liquid stools as 4 points.

1. **16S rRNA gene sequencing**

Genomic DNA from fecal samples was extracted following the protocol of Fast DNA™ SPIN Kit (MP Biomedicals, CA, USA). The V3–V4 region of the 16S rRNA gene was amplified using primers 338F (5′-ACTCCTACGGGAGGCAGCAG-3′) and 806R (5′-GACTACHVGGGTWTCTAAT-3′). PCR assay was performed as the following: initiation at 95 °C for 5 min, 20 cycles of 95 °C for 30 s, 55 °C for 30 s, and 72 °C for 30 s. Reactions were completed at 72 °C for 10 min. Purified amplicons were pooled in equimolar and paired-end sequenced (2 × 300) on an Illumina MiSeq platform (Illumina, San Diego, CA, USA) by Beijing Allwegene Tech, Ltd (Beijing, China). After the sequencing, data were analyzed via the QIIME pipeline (Quantitative Insights into Microbial Ecology, USA). The row sequences were jointed and selected (low-quality tags and chimeras that did not meet the length requirement were removed). The unique sequence with a similarity larger than 97% was classified into an operational taxonomic unit (OTU) by UCLUST (Version 1.2.22 http://www.drive5.com/uclust/downloads 1_2_22q.html). Chimeric sequences were identified and removed using Usearch (Version 8.1.1861 http://www.drive5.com /usearch/). The taxonomy of each 16S rRNA gene sequence was analyzed by UCLUST against the Silva 16S rRNA database (Release119 http://www.arb-silva.de) using a minimum threshold of 90% confidence. Finally, an OTU table was generated for relative abundance plots and further analysis.

1. **DNA extraction of fecal** **bacteria and abundance quantification by quantitative reverse transcription‑polymerase chain reaction (RT‑qPCR)**

To detect the contents of intestinal microbiota in feces of mice with antibiotics mixture treatment, 20 mg of stool sample was homogenized with 1 mL of PBS. After the centrifugation at 3000 ×g for 5 min, the supernatant was collected, and the precipitation was resuspended with 1 mL of PBS for further centrifugation. All supernatant from both collections were centrifuged at 13,000 ×g for 2 min. The supernatant was discarded and the remaining precipitate was washed with PBS three times. Finally, the bacterial precipitate was obtained for total DNA extraction using a Bacterial Genome DNA Extraction kit (Solarbio, Beijing, China). The RT-qPCR was performed on an ABI 7500 real-time PCR instrument (Thermo Fisher Scientific, Waltham, MA, USA) with the following reaction parameters: pre-denaturation at 95 °C for 10 min; 40 cycles of amplification (10 s at 95 °C for denaturation, 30 s at 55 °C for annealing, 30 s at 60 °C for extension). Primer sequences of target gut bacteria were listed in Supplementary Table 4. The bacterial plasmids were first diluted in gradient and then subjected to RT-qPCR assay. Bacterial contents were normalized by the standard curve using standard bacteria with different dilution series. The standard curve was plotted with Ct value as the horizontal coordinate and copies on a log10 scale as the vertical coordinate. Every pair of primers is considered specific when the shape of the melting curve is a single sharp peak.

**Supplementary Figures**


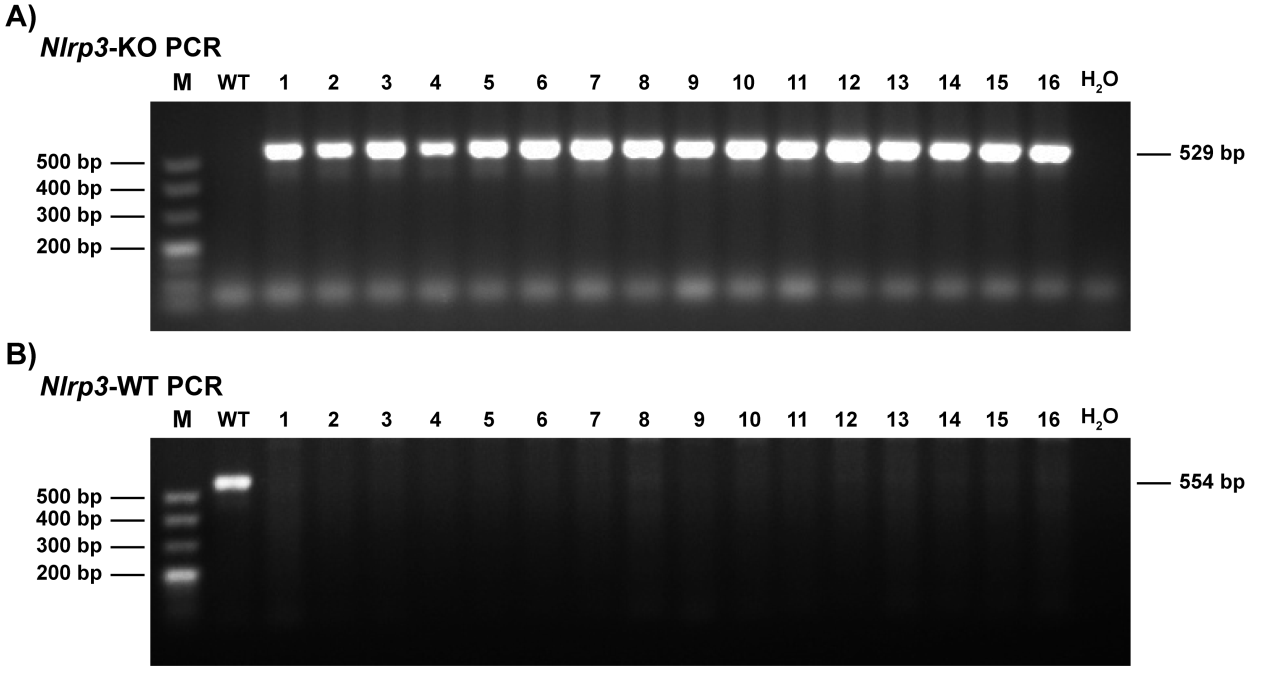


Fig. S1 Genotype identification of experimental mice. A) Identification of *Nlrp3*-KO mice by agarose gel electrophoresis. B) Identification of *Nlrp3*-WT mice by agarose gel electrophoresis. Homozygotes showed a band of 529 bp. Wild-type allele showed a band of 554 bp.


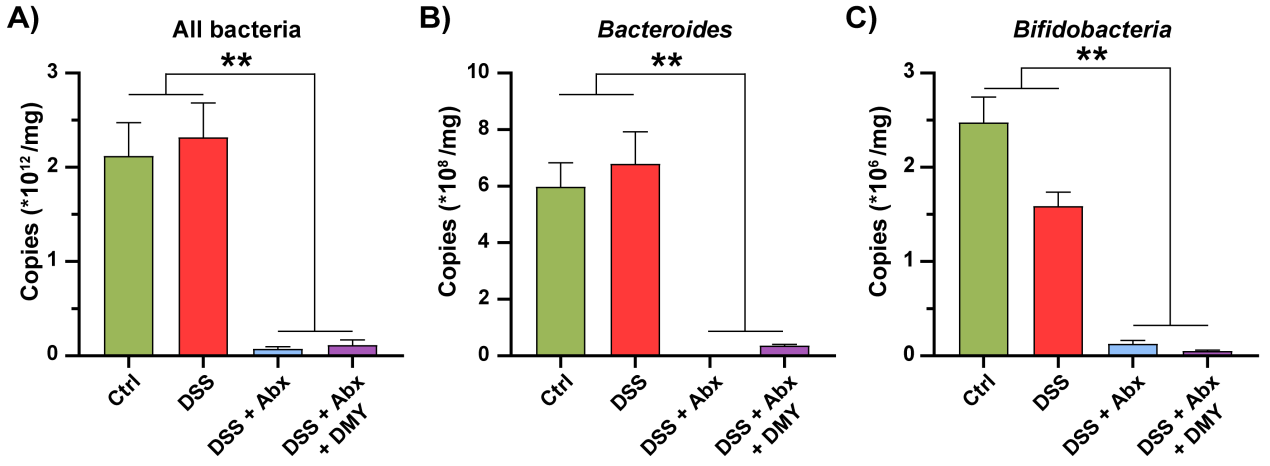


Fig. S2 Abundance determination of gut microbiota in mice treated with antibiotic mixtures. A) Abundance of all bacteria. B) Abundance of *bacteroides*. C) Abundance of *bifidobacteria*. Data were represented as mean ± SEM (n = 8), ***p* < 0.01.

**Supplementary Tables**

**Table 1. List of primer sequences for RT-qPCR analysis**

| **Name** | **Forward primer (5'-3')** | **Reverse primer (5'-3')** |
| --- | --- | --- |
| *Gapdh* | AGGTCGGTGTGAACGGATTTG | TGTAGACCATGTAGTTGAGGTCA |
| *Occludin* | TTGAAAGTCCACCTCCTTACAGA | CCGGATAAAAAGAGTACGCTGG |
| *Mucin 2* | ATGCCCACCTCCTCAAAGAC | GTAGTTTCCGTTGGAACAGTGAA |
| *Mucin 3* | CGTGGTCAACTGCGAGAATGG | CGGCTCTATCTCTACGCTCTCC |
| *Tnf-α* | GGGTGTTCATCCATTCTC | GGAAAGCCCATTTGAGT |
| *Il-6* | GAAACCGCTATGAAGTTCCTCTCTG | TGTTGGGAGTGGTATCCTCTGTGA |
| *Cox-2* | CGAGTCGTTCTGCCAATA | CTGGTCGGTTTGATGCTA |
| *Cxcl1* | GCACCCAAACCGAAGTCA | AAGCCAGCGTTCACCAGA |
| *Cxcl10* | TTGCCCTTGGTCTTCTGA | GTCGCACCTCCACATAGC |
| *Nlrp3* | ATTACCCGCCCGAGAAAGG | TCGCAGCAAAGATCCACACAG |
| *Il-1β* | GGCTGGACTGTTTCTAATGC | ATGGTTTCTTGTGACCCTGA |

**Table 2. The criteria of histological score**

| **Score** | **Inflammatory cell infiltration** | **Mucosal injury** | **Crypt distortion** | **Area of lesions (%)** | |
| --- | --- | --- | --- | --- | --- |
| 0 | None | None | None | None |
| 1 | Mild | Mucous layer | 1/3 | 1-25 |
| 2 | Moderate | Submucosa | 2/3 | 26-50 |
| 3 | Severe | Muscularis and serosa | 100% | 51-75 |
| 4 | – | – | Entire crypt and surface epithelium destroyed | 76-100 |

**Table 3. Statistics on raw/clean reads for 16S rRNA gene sequencing**

| **Sample ID** | **Raw tags** | **Clean tags** |
| --- | --- | --- |
| Ctrl1 | 168918 | 154416 |
| Ctrl2 | 154290 | 143500 |
| Ctrl3 | 110239 | 98383 |
| Ctrl4 | 162543 | 146630 |
| Ctrl5 | 130427 | 120795 |
| DSS1 | 90461 | 86903 |
| DSS2 | 98162 | 95339 |
| DSS3 | 168230 | 162413 |
| DSS4 | 111945 | 98981 |
| DSS5 | 125634 | 115974 |
| DSS + DMY1 | 64410 | 60382 |
| DSS + DMY2 | 110709 | 103674 |
| DSS + DMY3 | 76106 | 67677 |
| DSS + DMY4 | 69194 | 61594 |
| DSS + DMY5 | 159751 | 154892 |

**Table 4. List of primer sequences for RT-qPCR to determine gut microbiota abundances**

| **Bacterium** | **Forward primer (5'-3')** | **Reverse primer (5'-3')** |
| --- | --- | --- |
| All bacteria | ACTCCTACGGGAGGCAGCAGT | ATTACCGCGGCTGCTGGC |
| *Bacteroides* | GGTTCTGAGAGGAGGTCCC | GCTGCCTCCCGTAGGAGT |
| *Bifidobacterium* | TCGCGTCCGGTGTGAAAG | CCACATCCAGCGTCCAC |
